## RESEARCH ARTICLE

# Single crystal, Hirshfeld surface and theoretical analysis of methyl 4-hydroxybenzoate, a common cosmetic, drug and food preservative—Experiment versus theory

Abeer Sharfalddin<sup>1</sup>✉, Bambar Davaasuren<sup>2</sup>✉, Abdul-Hamid Emwas<sup>2</sup>, Mariusz Jaremko<sup>3</sup> , Lukasz Jaremko<sup>3\*</sup>, Mostafa Hussien<sup>1,4\*</sup>

**1** Department of Chemistry, Faculty of Science, King Abdulaziz University, Jeddah, Saudi Arabia, **2** Core Labs, King Abdullah University of Science and Technology (KAUST), Thuwal, Saudi Arabia, **3** Biological and Environmental Science and Engineering (BESE), King Abdullah University of Science and Technology (KAUST), Thuwal, Saudi Arabia, **4** Department of Chemistry, Faculty of Science, Port Said University, Port Said, Egypt

✉ These authors contributed equally to this work.

\* [maabdulaal@kau.edu.sa](mailto:maabdulaal@kau.edu.sa) (MH); [lukasz.jaremko@kaust.edu.sa](mailto:lukasz.jaremko@kaust.edu.sa) (LJ)

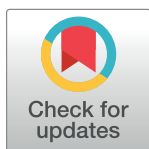

## OPEN ACCESS

**Citation:** Sharfalddin A, Davaasuren B, Emwas A-H, Jaremko M, Jaremko Ł, Hussien M (2020) Single crystal, Hirshfeld surface and theoretical analysis of methyl 4-hydroxybenzoate, a common cosmetic, drug and food preservative—Experiment versus theory. *PLoS ONE* 15(10): e0239200. <https://doi.org/10.1371/journal.pone.0239200>

**Editor:** Robert John O'Reilly, Beijing Foreign Studies University, CHINA

**Received:** July 4, 2020

**Accepted:** September 1, 2020

**Published:** October 6, 2020

**Copyright:** © 2020 Sharfalddin et al. This is an open access article distributed under the terms of the [Creative Commons Attribution License](https://creativecommons.org/licenses/by/4.0/), which permits unrestricted use, distribution, and reproduction in any medium, provided the original author and source are credited.

**Data Availability Statement:** Crystal's coordinates have been published in CCDC (Cambridge Structural Database) (<https://www.ccdc.cam.ac.uk/>) as CCDC 2000146.

**Funding:** The author(s) received no specific funding for this work.

**Competing interests:** The authors have declared that no competing interests exist.

## Abstract

Methyl 4-hydroxybenzoate, commonly known as methyl paraben, is an anti-microbial agent used in cosmetics and personal-care products, and as a food preservative. In this study, the single crystal X-ray structure of methyl 4-hydroxybenzoate was determined at 120 K. The crystal structure comprises three methyl 4-hydroxybenzoate molecules condensed to a 3D framework via extensive intermolecular hydrogen bonding. Hirshfeld surface analysis was performed to determine the intermolecular interactions and the crystal packing. In addition, computational calculations of methyl 4-hydroxybenzoate were obtained using the Gaussian 09W program, and by quantum mechanical methods, Hartree Fock (HF) and Density Functional Theory (DFT) with the 6–311G(d,p) basis set. The experimental FT-IR spectrum strongly correlated with the computed vibrational spectra ( $R^2 = 0.995$ ). The energies of the frontier orbitals, HOMO and LUMO, were used to calculate the chemical quantum parameters. The lower band gap value ( $\Delta E$ ) indicates the molecular determinants underlying the known pharmaceutical activity of the molecule.

## 1. Introduction

The polymorphic modifications of methyl 4-hydroxybenzoate, also known as p-oxybenzoic acid methyl ester, were first reported in the 1930s [1, 2]. Lindpaintner subsequently published six different solid forms of methyl 4-hydroxybenzoate based on their melting point [3]. The crystal structure of the first stable polymorphic modification (1) of methyl 4-hydroxybenzoate was communicated first by Lin [4] at room temperature and later at low temperatures [5–7].

We have numbered these modifications to distinguish four different modifications, which doesn't completely match Lindpaintner's report. In all previous reports, the methyl 4-hydroxybenzoate was recrystallized from alcoholic solvents, either ethanol or methanol, at room temperature. New metastable polymorphic modifications 2 and 4 [8, 9] were obtained from temperature-controlled sublimation experiments, while polymorph 3 was crystallized from the melt [9]. All reported polymorphs of methyl 4-hydroxybenzoate crystallize in the monoclinic crystal system: the modifications 1 and 3 crystallize with Cc (9) symmetry, while polymorphs 2 and 4 crystallize in space group P21/c (14). Interestingly, among all four modifications, only 1 has three independent molecules in the asymmetric unit,  $Z' = 3$ , and the others are  $Z' = 1$  polymorphs. Gelbrich et al. reported that the presence of  $Z' = 3$  phase is associated with the preference of local symmetry elements in the crystal structure [9]. The methyl 4-hydroxybenzoate molecules are connected through extensive O-H...O hydrogen bonding-forming 1D chains. The molecular geometry and the H-bonding motif (C<sub>1</sub><sup>1</sup> (8) graph set) is identical in all reported modifications. However, the main difference between the four polymorphs is the geometry of the formed 1D chains through H-bonding [8, 9]. Nath et al. carried out 2D Hirshfeld surface analysis and IR- spectroscopic studies of polymorphs 1 and 2 to highlight the differences between the two modifications in terms of hydrogen bonding and aromatic interactions [8]. The lattice energy of all four polymorphs of methyl 4-hydroxybenzoate was calculated using various theoretical approaches and compared [9].

In this study, our main aim was to combine the available crystallographic data for 4-hydroxybenzoate, which is isomeric to the well-known salicylic acid molecule, with the results of theoretical calculations in order to redefine the molecular structure from single crystal XRD studies and to optimize the theoretical structure. Moreover, determination of the chemical properties can be achieved by predicting and experimentally describing the obtained molecular geometry of low-weight organic compounds based on available crystal state set methods. The total structure of the molecule with two different methods, Hartree Fock (HF) and Density Functional Theory (DFT) methods, was used to study the numerous vibrational modes with their wavenumbers. Subsequently, we correlated the optimized structure with the experimental data. Moreover, we used Mulliken atomic charge analysis to test the charge distribution on the molecule. Frontier molecular orbitals (FMO) analyses were calculated to obtain the quantum parameters, chemical hardness, chemical potential, and electronegativity.

## 2. Experimental

### 2.1. Chemical and methods

Methyl 4-hydroxybenzoate was purchased from Aldrich Company and used as received. The single crystals were obtained by slowly evaporating ethanol solution at room temperature. The solid-state FT-IR spectra were recorded at room temperature in the region of 4000–450 cm<sup>-1</sup> using a Perkin-Elmer spectrometer.

The single crystal X-ray diffraction measurements were carried out on a Bruker D8 Venture diffractometer equipped with microfocus (I $\mu$ S) Mo K $\alpha$ -source, Photon 2D detector and low temperature Oxford-Cryo system. The data collection, reduction and corrections were done using the Bruker APEX3 software suite and SAINT [10]. The crystal structure was solved by SHELXT [11] and refined with the SHELXL program [12]. The graphical images were produced by Diamond 4 [13].

### 2.2. Computational details

The Gaussian 09 program package [14] was used to obtain all theoretical calculations. Gauss View 5.0 [15] was used to prepare the output files and to visualize the molecular structure. The

organic molecule was optimized in gas phase by the Hartree-Fock (HF) method using the 6-311G(d,p) basis set. Moreover, the Density Functional Theory (DFT) was used with the B3LYP functional [16] and the 6-311G(d,p) basis set. The vibrational frequencies calculation was performed for the obtained optimized molecules at the same theory level to confirm that all stationary points are minima and do not have imaginary frequencies. Moreover, frequency values computed at these levels contain known systematic errors. Therefore, the scaling factor values 0.909 and 0.967 for HF and DFT/ B3LYP, respectively, were used to correct for anharmonicity and the neglected aspect of electron correlation [17].

The frontier molecular orbitals (FMO) were computed with single point energy using the HF and DFT method with the 6-311G(d,p) basis set. Essential quantum parameters were estimated according to known equations [18–20] as follows; energy gap ( $\Delta E = E_{\text{LUMO}} - E_{\text{HOMO}}$ ), absolute electronegativities ( $\chi = -E_{\text{HOMO}} + E_{\text{LUMO}}/2$ ), absolute hardness ( $= E_{\text{LUMO}} - E_{\text{HOMO}}/2$ ), absolute softness ( $\sigma = 1/$ ), chemical potentials ( $\mu = -\chi$ ), global softness ( $S = 1/2$ ), global electrophilicity ( $\omega = \pi^2/2$ ), and additional electronic charge ( $\Delta N_{\text{max}} = -\pi/$ ).

### 3. Results and discussion

#### 3.1. Crystal chemistry

Block shaped, isometric transparent single crystals of the title compound were isolated from mother liquor and measured at 120 K. The methyl 4-hydroxybenzoate (methyl paraben) crystallizes with monoclinic symmetry in space group *Cc* (9) with unit cell parameters:  $a = 12.9874(7)$  Å,  $b = 17.2522(7)$  Å,  $c = 10.8435(5)$  Å and  $\beta = 119.225(2)^\circ$ . All atoms were refined anisotropically and occupy general positions (4a). The hydrogen atoms were refined using a riding model with  $U_{\text{iso}}(\text{H}) = 1.2$  (aromatic) or 1.5 (methyl and hydroxyl). Table 1 summarizes the crystal data and refinement results. The crystal structure belongs to the methyl 4-hydroxybenzoate polymorph 1, mentioned in the introduction, and is identical to the crystal structure reported by Fun et al [7]. Briefly, the structure contains three crystallographically independent molecules in the asymmetric unit,  $Z' = 3$ . The molecules are color-coded differently in Fig 1 for clarity: molecule 1—black, molecule 2—blue, and molecule 3—green. There are two different 1D chains in the crystal structure formed through O-H...O hydrogen bonding of methyl 4-hydroxybenzoate molecules with  $D \cdots A$  distances of 2.726(2)—2.765(2) Å (Fig 1). Chain 1 is formed by alternating molecule 1 (black) and 2 (blue), while chain 2 is composed solely of molecule 3 (green).

These chains are running parallel to the [101] direction and are connected by C-H...O hydrogen bonding, with  $D \cdots A$  distances of 3.195(2)—3.337(2) Å, to form 2D layers propagating along the  $b$  axis. These 2D layers can be noted as  ${}^2_{\infty}[112]$ , where the number in the bracket stands for chains 1 and 2. The supramolecular feature of the crystal structure is realized by  $\dots AB \dots$  stacking of  ${}^2_{\infty}[112]$  layers along the [102] direction. All the interatomic distances and bond angles are in the same range between the three molecules, and agree well with those in all other reported polymorphs [4, 5, 7–9].

#### 3.2. Hirshfeld surface analysis

Hirshfeld surface analysis is a quantitative way to study the intermolecular interactions of the molecules in a crystal structure. Moreover, it gives details of their crystal packing behavior. Hirshfeld surfaces and fingerprint plots were mapped with Crystal Explorer 3.1 software [21]. The analysis was visualized by the normalized contact distance ( $d_{\text{norm}}$ ), which was obtained using a high surface resolution with a static color scale of -0.222 (red) to 1.274 Å (blue) and

**Table 1. The crystallographic data and refinement details.**

|                                                                  |                                              |
|------------------------------------------------------------------|----------------------------------------------|
| Chemical formula                                                 | C <sub>8</sub> H <sub>8</sub> O <sub>3</sub> |
| Molecular mass                                                   | 152.14                                       |
| Crystal system, space group                                      | Monoclinic, Cc                               |
| Temperature (K)                                                  | 120                                          |
| <i>a</i> (Å)                                                     | 12.9874 (7)                                  |
| <i>b</i> (Å)                                                     | 17.2522 (7)                                  |
| <i>c</i> (Å)                                                     | 10.8435 (5)                                  |
| $\beta$ (°)                                                      | 119.225 (2)                                  |
| <i>V</i> (Å <sup>3</sup> )                                       | 2120.34 (18)                                 |
| <i>Z</i>                                                         | 12                                           |
| Radiation type                                                   | Mo <i>K</i> $\alpha$                         |
| $\mu$ (mm <sup>-1</sup> )                                        | 0.11                                         |
| <i>h, k, l</i>                                                   | $-24 \leq h \leq 24$                         |
|                                                                  | $-33 \leq k \leq 33$                         |
|                                                                  | $-20 \leq l \leq 20$                         |
|                                                                  | 0.050                                        |
| <i>R</i> <sub>int</sub>                                          | 0.045                                        |
| <i>R</i> <sub>1</sub>                                            | 0.142                                        |
| <i>wR</i> <sub>2</sub>                                           | 1.08                                         |
| Goodness of fit ( <i>S</i> )                                     | 15758                                        |
| No. of independent reflections                                   | 301                                          |
| No. of parameters                                                | 0.57, -0.39                                  |
| $\Delta \rho_{\max}$ , $\Delta \rho_{\min}$ (e Å <sup>-3</sup> ) |                                              |

The CIF file can be obtained from the CCDC database quoting the number 2000146.

<https://doi.org/10.1371/journal.pone.0239200.t001>

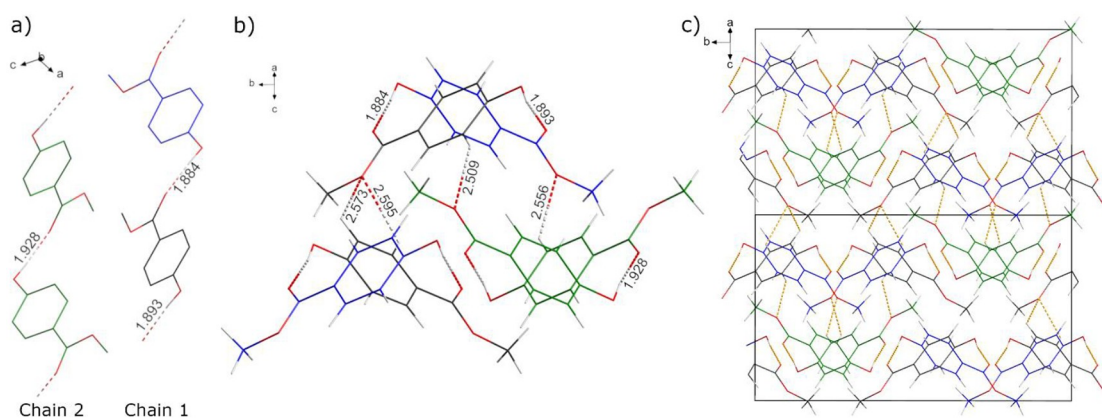

**Fig 1. The arrangement of methyl 4-hydroxybenzoate molecules depicted by a wire-stick model.** Three independent molecules are shown in black (1), blue (2), and green (3). a) 1D molecular zig-zag chains formed through O-H...O hydrogen bonding viewed around the *b* axis. Chain 1 is formed by alternating molecules 1 and 2, while chain 2 is composed of only molecule 3; b) 1D chains are running parallel to the [101] direction and are connected to each other via C-H...O H-bonding. The H-bonding distances are shown on the respective bonds; c) Supramolecular feature of the crystal structure is realized by ...AB... stacking of the  $^2_{\infty}$  [112] layers along the [102] direction.

<https://doi.org/10.1371/journal.pone.0239200.g001>

computed with the following Eq 1;

$$d_{norm} = \frac{d_i - r_i^{vdw}}{r_i^{vdw}} + \frac{d_e - r_e^{vdw}}{r_e^{vdw}} \quad (1)$$

Where  $d_e$  is the distance from the Hirshfeld surface to the nearest nucleus outside the surface,  $d_i$  is the corresponding distance to the nearest nucleus inside the surface, and  $r^{vdw}$  is the van der Waals radius of the atom [22]. The  $d_{norm}$  parameter exhibits a surface with a red-white blue color scheme [23]. Bright red spots show the intermolecular contacts less than their  $vdW$  radii, while the blue spots show intermolecular contacts longer than their  $vdW$  radii. White spots are the sum of their  $vdW$  radii.

Fig 2 shows that there are two red spots, indicating hydrogen bonding contacts. The first hydrogen bond is performed by the oxygen atom (O3), which plays a role as a donor atom to the neighboring H4A atom, which acts as an acceptor atom. The second hydrogen bond is between the hydrogen atom H7 with the Oxygen O7 as the donor atom from the neighboring molecule. There are harmonious relationships between these spots and intermolecular bonding.

The 2D representation of a Hirshfeld surface is presented in Fig 3. The O...H interactions appeared as scattered spikes in the 2D fingerprint plots with overall Hirshfeld surfaces of (16.8 + 12.8 = 29.7%). The contribution from the C—H contacts is represented below the pair of sharp spikes of O—H and are characterized by strong hydrogen-bonding interactions (11.8% + 9% = 20.8%) whereas the other fingerprint plots are represented in Fig 3.

### 3.3. Optimized molecular geometry

The optimized geometry of the methyl 4-hydroxybenzoate molecule was obtained by both HF and DFT calculations with the 6-311G (d,p) basis set, and the optimized structures are shown in Fig 4. A comparison of the optimized bond length, bond angles and dihedral angles were obtained from the HF and DFT methods with the experimental values presented in Table 2. The theoretical bond length and angles showed a slight deviation from the crystal parameters because the calculations were carried out in the gaseous phase for both HF and DFT while the experimental values were for the crystalline state. Careful analysis of the extracted data allows us to conclude that the bond length and angle calculated by the HF and DFT/6-311G(d,p) methods correlate strongly with the experimental values, with an average divergence of 0.01 Å to 0.04 Å. For instance, the optimized bond of the carboxyl group O10-C8 (1.216 Å) closely matches the experimental length (1.218 Å). The experimental bond length for carboxyl O10-C8 was shorter than the ester oxygen O9-C8, and the HF (1.216/1344 Å) and DFT (1.205/1.365) methods indicated that O10-C8 is a double bond. In all experimental results, C-H bonds were shorter than those calculated by both HF and DFT. In the benzene ring, the bond length of C1-C2, C3-C4 and C5-C6 from the DFT method were in close agreement with the experimental length with minimal deviation ( $\pm 0.03$ ). This result shows that the electron delocalization occurs between those carbon atoms in the aromatic ring to make the structure more stable [24]. Moreover, the observed deviation may be due to the fact that the X-ray structure was solved in a crystalline form whereas the calculation for the optimized structures were for the isolated molecules [25].

The related dihedral angles show that the methyl 4-hydroxybenzoate ring system is planar, as O7—C1—C2—C3, O7—C6—C1—C4 and C11—O9—C8—C3 are 180°. However, the overall dihedral angles calculated using the DFT/B3LYP method correlated well when compared with the experimental results.

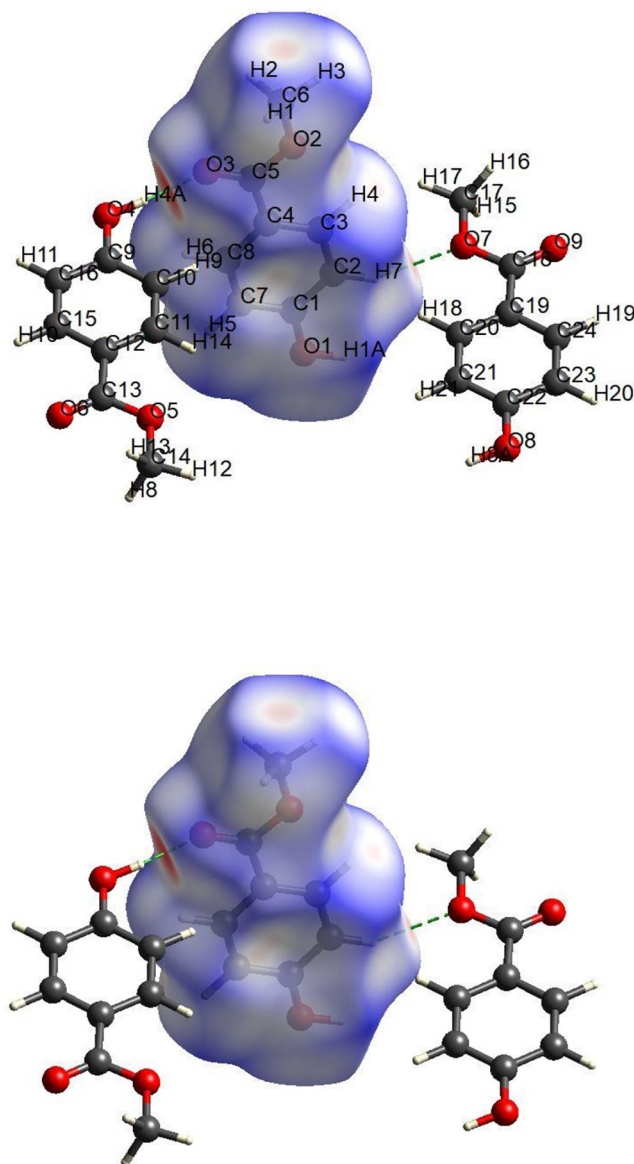

**Fig 2. The Hirshfeld surface of the compound mapped with dnorm.**

<https://doi.org/10.1371/journal.pone.0239200.g002>

In order to investigate the performance of the two methods, HF and DFT/B3LYP, for the title compound, we computed the root mean square deviation (RMSD) between the calculated bond length or angles or the dihedral angles for each method, and the experimental data. RMSD values were evaluated using the following expression [26]

$$\text{RMSD} = \sqrt{\frac{1}{n-2} \sum_i^n (X_{\text{exp}} - X_{\text{cal.}})^2} \quad (2)$$

The calculated RMSD are listed in Table 2. The bond length error was very small and close to zero for both methods unless the HF method showed the best value and approximated the observed fundamental bond lengths much better than the other method. Moreover, the deviation from the experimental data of the angle values calculated using the HF method was also

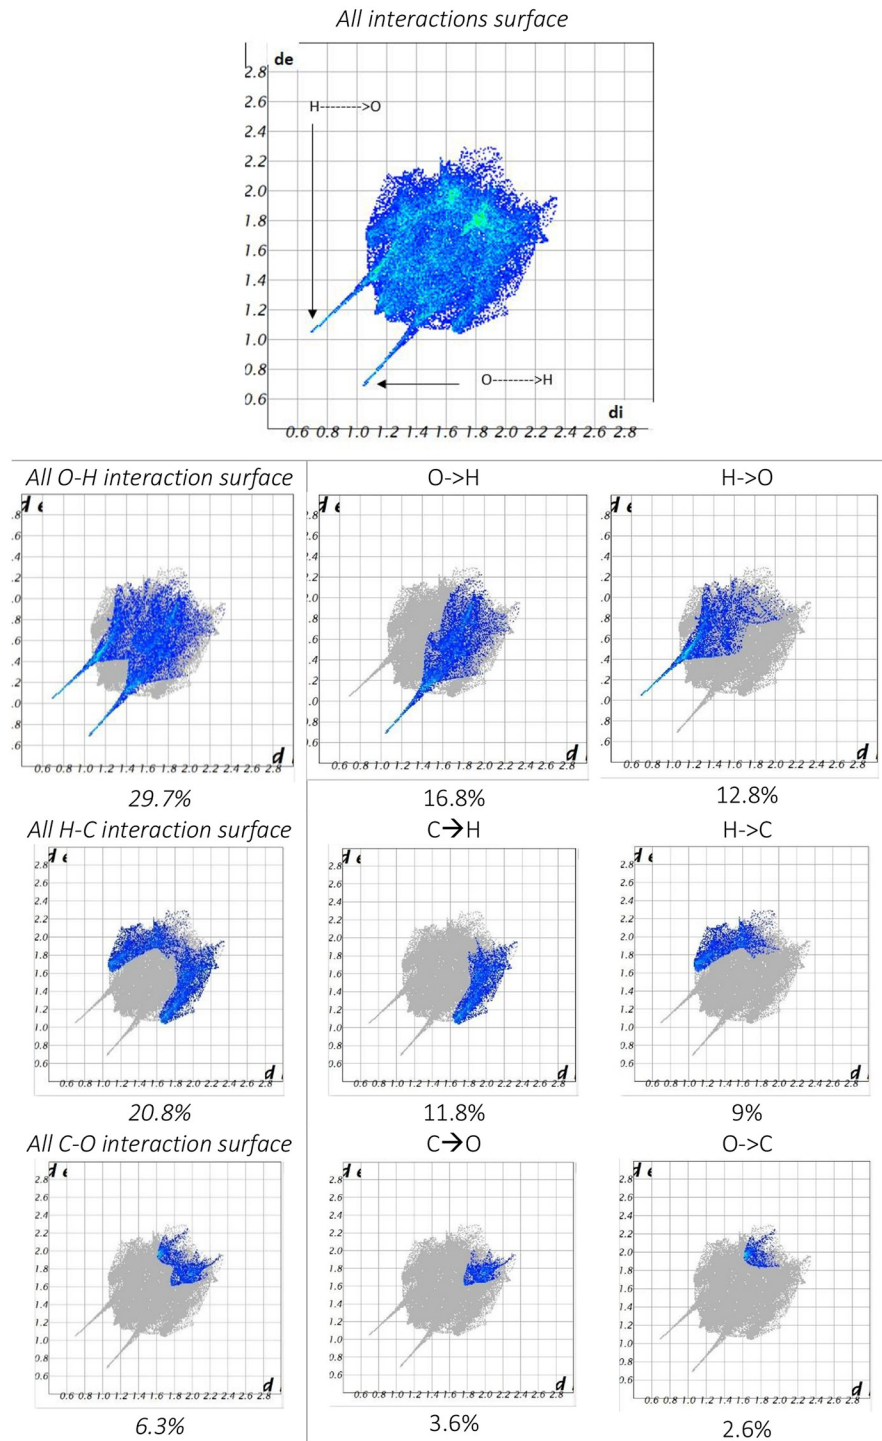

**Fig 3. Atom-atom interactions and their contribution to the Hirshfeld surface.**

<https://doi.org/10.1371/journal.pone.0239200.g003>

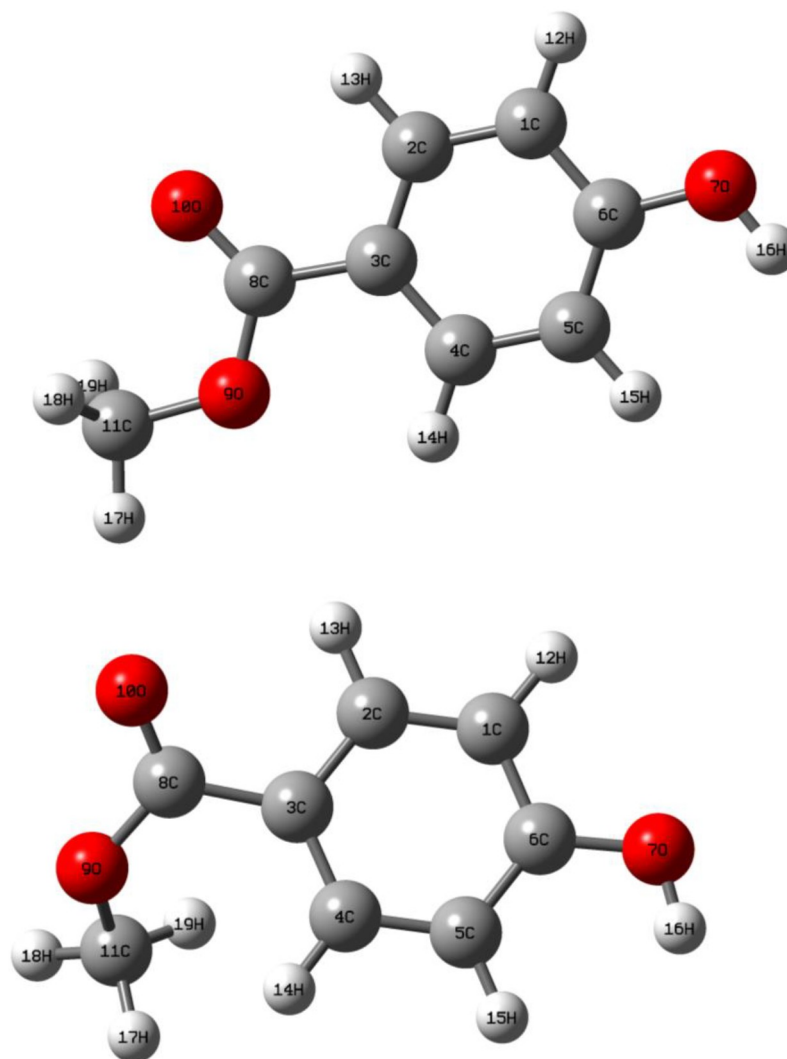

**Fig 4. Optimized structure with atomic numbering obtained by the (a) HF and (b) DFT methods.**

<https://doi.org/10.1371/journal.pone.0239200.g004>

better than the DFT method. Interestingly, dihedral angles obtained using the DFT method were in good approximation and closer than when using the other method.

### 3.4. Mulliken atomic charge analysis

The atomic charges greatly affect molecular system properties such as the dipole moment, the electronic structure, the acidity–basicity behavior, and the vibration mode [24, 27]. Moreover, the charge distribution on the molecule is used to distinguish the donor atoms from the acceptor ligand atoms. The calculated Mulliken charge values using various levels of theory, HF and DFT with the 6-311G(d,p) atomic basis sets, are listed in Table 3 and show that one carbon (C8) has a positive charge in the geometry calculated using the HF and DFT methods because it is surrounded by two electrons withdrawing oxygen atoms, which become negatively charged atoms. Among the other negative carbon atoms, C3, C5 and C6 are more negatively charged, which indicates greater electron delocalization around the aromatic ring [24]. Despite the fact that each hydrogen atom has a positive charge, H16 has the highest positive charge



Table 2. The optimized molecular geometrical parameters of methyl 4-hydroxybenzoate.

| parameters       | Experimental | HF     | DFT    |
|------------------|--------------|--------|--------|
| Bond length (°A) |              |        |        |
| O7-C6            | 1.353        | 1.369  | 1.360  |
| O7-H16           | 0.840        | 0.945  | 0.953  |
| O10-C8           | 1.225        | 1.216  | 1.203  |
| C8-O9            | 1.331        | 1.344  | 1.365  |
| O9-C11           | 1.446        | 1.442  | 1.435  |
| C1-C2            | 1.385        | 1.378  | 1.384  |
| C1-C6            | 1.395        | 1.395  | 1.399  |
| C2-C3            | 1.397        | 1.388  | 1.380  |
| C1-H12           | 0.93         | 1.068  | 1.083  |
| C3-C4            | 1.401        | 1.389  | 1.403  |
| C2-H13           | 0.950        | 1.069  | 1.083  |
| C3-C4            | 1.401        | 1.386  | 1.399  |
| C3-C8            | 1.474        | 1.468  | 1.494  |
| C6-C5            | 1.398        | 1.386  | 1.390  |
| C4-H14           | 0.980        | 1.068  | 1.083  |
| C5-H15           | 0.980        | 1.071  | 1.086  |
| C11-H17          | 0.96         | 1.073  | 1.093  |
| C11-H18          | 0.96         | 1.077  | 1.091  |
| C11-H19          | 0.96         | 1.077  | 1.091  |
| RMSD             | -            | 0.077  | 0.088  |
| Bond angle (°)   |              |        |        |
| C6-O7-H16        | 109.50       | 114.94 | 109.57 |
| C8-O9-C11        | 116.48       | 119.25 | 122.1  |
| O7-C6-C5         | 122.48       | 122.33 | 122.75 |
| O7-C6-C1         | 117.47       | 116.88 | 117.38 |
| C5-C6-C1         | 120.3        | 120.80 | 119.88 |
| C2-C1-C6         | 120.3        | 119.33 | 119.71 |
| C2-C1-H12        | 121          | 121.79 | 121.45 |
| C6-C1-H12        | 119.5        | 118.88 | 118.83 |
| C1-C2-C3         | 119.5        | 120.63 | 121.1  |
| C1-C2-H13        | 119.5        | 120.44 | 120.31 |
| C3-C2-H13        | 118.9        | 118.91 | 118.61 |
| C2-C3-C4         | 122.1        | 119.39 | 118.61 |
| C2-C3-C8         | 120          | 118.68 | 118.1  |
| C4-C3-C8         | 120          | 120.93 | 123.1  |
| C5-C4-C3         | 120.45       | 120.32 | 120.77 |
| C5-C4-H14        | 120.1        | 120.10 | 119    |
| C3-C4-H14        | 119.8        | 119.59 | 120.2  |
| C4-C5-C6         | 119.85       | 119.54 | 119.91 |
| C4-C5-H15        | 120.1        | 120.19 | 120.1  |
| O10-C8-O9        | 124.58       | 121.64 | 118.8  |
| O10-C8-C3        | 112.7        | 124.64 | 122.42 |
| O9-C8-C3         | 109.5        | 113.72 | 118.73 |
| O9-C11-H18       | 109.5        | 110.16 | 110.44 |
| O9-C11-H18       | 109.5        | 110.17 | 112    |
| RMSD             | -            | 2.89   | 3.37   |

(Continued)

Table 2. (Continued)

| parameters          | Experimental | HF      | DFT    |
|---------------------|--------------|---------|--------|
| dihedral angles (°) |              |         |        |
| O7—C1—C2—C3         | 180          | 179.9   | 179    |
| C6—C1—C2—C3         | 1.2          | 0.018   | 1.2    |
| C1—C2—C3—C4         | -0.1         | -0.010  | -0.08  |
| C2—C3—C4—C5         | -1.2         | -0.018  | -1.72  |
| C2—C3—C4—C7         | 177          | 179     | 177.9  |
| C3—C4—C5—C6         | 1.5          | 0.0019  | 1.1    |
| C8—C4—C5—C6         | -177         | -179    | -177.5 |
| C3—C4—C6—C1         | -0.4         | -0.0088 | -0.49  |
| O7—C6—C1—C4         | -179.7       | -180    | -179.5 |
| C1—C6—C5—C4         | -1           | -0.0123 | -0.934 |
| C11—O9—C8—O10       | 0.8          | 0.0069  | 0.85   |
| C11—O9—C8—C3        | -179.72      | -180    | -179.3 |
| C2—C3—C8—O10        | -3.4         | 0.0065  | -3.43  |
| C4—C3—C8—O10        | 175.1        | 179     | 174.71 |
| C2—C3—C8—O9         | 177.1        | 180     | 177.0  |
| RMSD                | -            | 1.96    | 0.38   |

<https://doi.org/10.1371/journal.pone.0239200.t002>

(0.408 e). This is due to the binding to an atom with higher electronegativity, oxygen (O7), which could easily deprotonate in suitable medium. The high negative charge density on all oxygen atoms provide donor sites for possible coordination with metal cations. Therefore, those oxygen atoms and the positive hydrogen play crucial roles in forming the hydrogen bonding network in the crystalline state.

Table 3. Mulliken atomic charges for optimized geometry of methyl 4-hydroxybenzoate.

| Atom label | HF/6-311++G(d,p) | DFT/6-311++G(d,p) |
|------------|------------------|-------------------|
| C1         | -0.216           | -0.090            |
| C2         | -0.053           | -0.025            |
| C3         | -0.256           | -0.241            |
| C4         | -0.028           | -0.037            |
| C5         | -0.240           | -0.130            |
| C6         | -0.410           | 0.166             |
| O7         | -0.757           | -0.350            |
| C8         | 0.747            | 0.414             |
| O9         | -0.672           | -0.320            |
| O10        | -0.534           | -0.302            |
| C11        | -0.170           | -0.130            |
| H12        | 0.197            | 0.113             |
| H13        | 0.213            | 0.114             |
| H14        | 0.209            | 0.107             |
| H15        | 0.176            | 0.093             |
| H16        | 0.408            | 0.251             |
| H17        | 0.185            | 0.109             |
| H18        | 0.191            | 0.134             |
| H19        | 0.191            | 0.125             |

<https://doi.org/10.1371/journal.pone.0239200.t003>

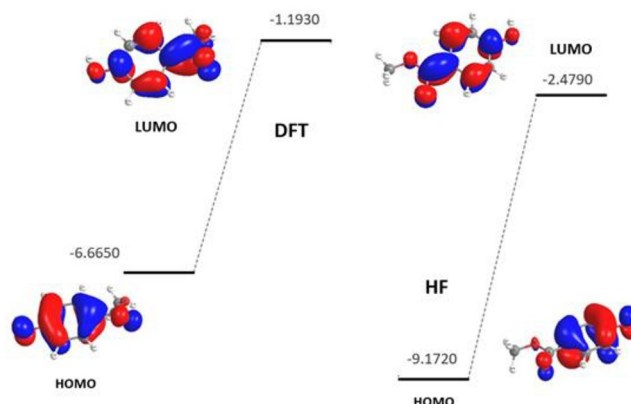

Fig 5. Calculated 3D of HOMOs-LUMOs plots and their energies (eV) of the compound by HF and DFT/B3LYP with 6-311G(d,p).

<https://doi.org/10.1371/journal.pone.0239200.g005>

### 3.5. Frontier molecular orbitals (FMOs) parameters

Frontier molecular orbitals are used to study the energies of the highest occupied molecular orbital (HOMO) and lowest unoccupied molecular orbitals (LUMO). HOMO presents the nucleophilicity of the molecule (electron donating) while LUMO illustrates the electrophilicity (electron accepting) of the molecule. The calculation of the energy of those orbitals with HF and DFT methods were at the ground state. Fig 5 shows that the charge density of the HOMO and LUMO orbitals is distributed on the phenol moiety and the ester oxygen atoms for both utilized calculation methods. The quantum chemical descriptors are summarized in Table 4. The HF/HOMO value is (-0.43 au), higher than the DFT/HOMO method (-0.24 au), where LUMO orbitals were -0.09 and -0.04 au for HF and DFT, respectively. The results revealed the abilities of the methyl 4-hydroxybenzoate molecule to donate electrons to electrophilic molecules. The energy gap ( $\Delta E$ ) is the difference between the HOMO and LUMO, which is used to determine computational parameters namely: chemical hardness, chemical softness, electronegativity, and the chemical potential of a molecule. The small energy gap ( $\Delta E$ ) indicated a high reactivity of methyl 4-hydroxybenzoate with low kinetic stability [24]. Moreover, the molecule has high softness values (S) indicating a high reactivity and an interpretation of the biological activity of the molecule [28, 29]. The negative value of the chemical potential ( $\pi$ ) of methyl 4-hydroxybenzoate indicates spontaneous reaction processes [30].

### 3.6. Assignments of vibrational spectra

Studying the vibrational spectroscopic spectrum gives a valuable description of the bonding force and the intermolecular bond strength. The FT-IR analysis for the compound was performed with solid sample in the range 400–4000  $\text{cm}^{-1}$  and is illustrated in Fig 6 with the corresponding theoretical spectra. The essential assignment vibration bands of methyl 4-hydroxybenzoate are listed in Table 5 and are compared with the computed results of both HF and DFT/B3LYP with the 6-311G (d,p) basis sets. The OH stretching frequency appeared

Table 4. Quantum chemical parameters for methyl 4-hydroxybenzoate calculated at the HF and DFT levels.

| method     | HUMO  | LUMO  | $\Delta E$ | x    |      | $\sigma$ | Pi    | $\sigma$ | S    | $\omega$ | $\Delta N \text{ max}$ |
|------------|-------|-------|------------|------|------|----------|-------|----------|------|----------|------------------------|
| DFT/ B3LYP | -6.67 | -1.19 | 5.47       | 3.93 | 2.74 | 0.37     | -3.93 | 0.37     | 1.37 | 2.82     | 1.44                   |
| HF         | -9.17 | -2.48 | 6.69       | 5.83 | 3.35 | 0.30     | -5.83 | 1.67     | 1.67 | 2.91     | 1.74                   |

<https://doi.org/10.1371/journal.pone.0239200.t004>

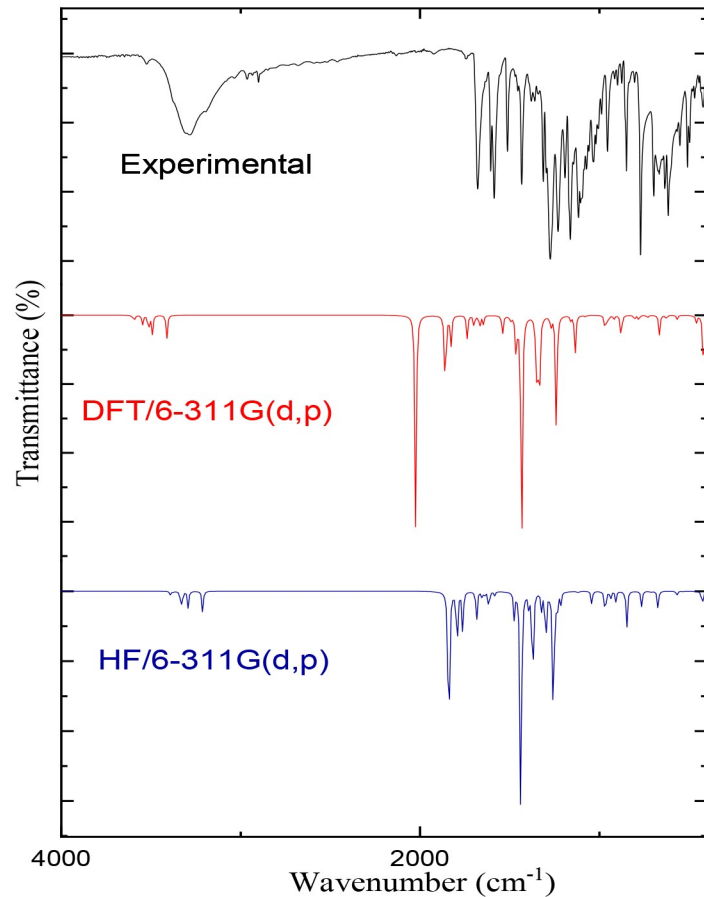

**Fig 6. Comparative representations of FT-IR spectra for methyl 4-hydroxybenzoate.**

<https://doi.org/10.1371/journal.pone.0239200.g006>

at 3695 and 3700  $\text{cm}^{-1}$  for HF and DFT, respectively. The corresponding stretching band in the IR spectrum is at 3287  $\text{cm}^{-1}$  with a broadened envelope band due to hydrogen bonding of the phenolic OH group. The hydrogen bond caused the division of the theoretical results and shifted the experimental OH peak to low frequencies [24]. The stretching vibration value of CH phenyl banding was 3040  $\text{cm}^{-1}$  while the vibration of the methyl group was seen at 2900  $\text{cm}^{-1}$ . The DFT calculation results for these bands and the HF value are close to the experiments frequencies range. The most characterized band for the ester group (C = O) stretching absorbance was found at 1678  $\text{cm}^{-1}$  in the IR spectrum. Moreover, the other observed band for C = O at 1588  $\text{cm}^{-1}$  is due to the hydrogen bonded to ester group [31]. The HF and DFT

**Table 5. Observed and calculated IR wavenumbers for methyl 4-hydroxybenzoate.**

| Assignments               | Experimental | HF/Scal. | DFT/Scal. |
|---------------------------|--------------|----------|-----------|
| $\nu$ OH                  | 3287         | 3694.9   | 3701.1    |
| $\nu$ CH phenyl           | 3040         | 3068.6   | 3048.9    |
| $\nu$ CH methyl           | 2900         | 2903.3   | 2932.7    |
| $\nu$ C = O               | 1678–1588    | 1672.5   | 1731.1    |
| $\nu$ C-O-CH <sub>3</sub> | 1292         | 1292.7   | 1231.9    |
| $\nu$ CH <sub>3</sub> -O  | 1115         | 1117.4   | 1075.3    |

<https://doi.org/10.1371/journal.pone.0239200.t005>

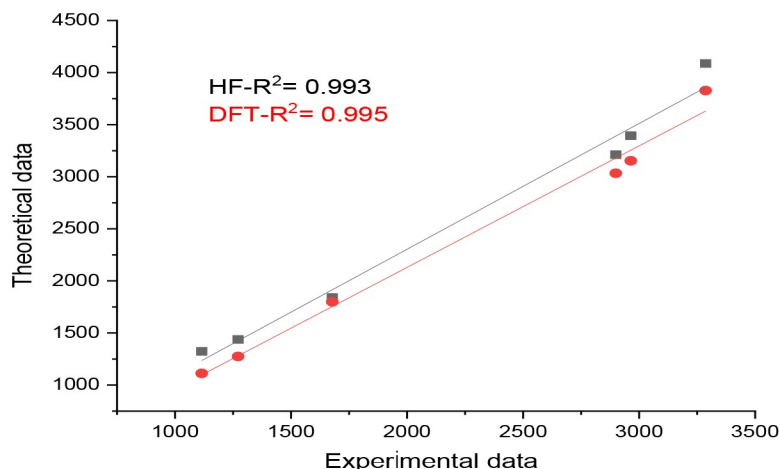

**Fig 7. Correlation between observed and calculated IR vibrational frequencies of methyl 4-hydroxybenzoate.**

<https://doi.org/10.1371/journal.pone.0239200.g007>

calculation showed the C = O frequency at 1672.5 and 1731  $\text{cm}^{-1}$ , respectively. the HF value was consistent with the experimental results. The slight differences between these values and the experimental ones are mainly due to the fact that theoretical results were calculated in the gas phase. The vibrations of the other effective bands for esters group C-O-CH<sub>3</sub> at 1272  $\text{cm}^{-1}$  and CH<sub>3</sub>-O at 1115  $\text{cm}^{-1}$  were in the same bond as identified by the HF method. The peaks below 1000  $\text{cm}^{-1}$  were for out-of-plane CH bends and observed in the same range. The correlation between the experimental and theoretical results were  $R^2 = 0.993$  and 0.995 for HF and DFT methods, indicating a strong, reliable correlation for experimental and calculated vibrational absorbance values with the HF and DFT methods (See Fig 7).

## Conclusion

In an attempt to explore the optimized geometry of methyl 4-hydroxybenzoate and harmonic vibration mode, we carried out theoretical studies at the HF and DFT levels with the 6-311G (d,p) basis set, using the structural data obtained from single crystal XRD. The computed RMSD values illustrated that the bond length and the dihedral angle obtained from the single crystal structural analysis were most likely correlated to the theoretical calculation HF and DFT, respectively. Mulliken atomic charge analysis indicated that the three oxygens are donor atoms in the molecule and active sites for chemical bonding. The low value of the energy gap between HOMO and LUMO informs on the reactivities of the organic molecule and agrees with the high softness results. The collected results will be useful in further studies focusing on the coordination chemistry of methyl 4-hydroxybenzoate with metal ions and subsequent biological research.

## Supporting information

**S1 File.** All output file for the calculation have attached in the supplementary data to this article.

(RAR)

**S2 File.**

(PDF)

## Acknowledgments

We thank King Abdul Aziz University for using their facilities and also thank King Abdullah University of Science and Technology (KAUST) for their support.

## Author Contributions

**Data curation:** Abdul-Hamid Emwas, Mariusz Jaremko, Łukasz Jaremko, Mostafa Hussien.

**Formal analysis:** Abeer Sharfalddin, Bambar Davaasuren.

**Validation:** Abeer Sharfalddin, Bambar Davaasuren.

**Writing – original draft:** Abdul-Hamid Emwas, Mariusz Jaremko, Łukasz Jaremko, Mostafa Hussien.

**Writing – review & editing:** Abdul-Hamid Emwas, Mariusz Jaremko, Łukasz Jaremko, Mostafa Hussien.

## References

1. Fischer V.R. and Stauder F., *Mikrochemie* 1930. 8: p. 330–336.
2. Kofler L. and Kofler A., About two modifications of p-Oxybenzoic acid methylester. *Mikrochemie*, 1931. 8: p. 45–51.
3. Lindpaintner E., *Microscopic Study of Polymorphic Substances. II. Mikrochemie*, 1939. 27: p. 21–41.
4. Lin X. and Chin T., *Journal of Structural Chemistry*, 1983. 24(2): p. 213.
5. Vujovic D. and Nassimbeni L.R., Methyl Paraben A New Polymorph? *Crystal Growth and Design*, 2006. 6(7): p. 1595–1597.
6. Threlfall T.L. and Gelbrich T., The Crystal Structure of Methyl Paraben at 118 K Does Not Represent a New Polymorph. *Crystal Growth and Design*, 2007. 7(11): p. 2297–2297.
7. Fun H.-K. and Jebas S.R., A second monoclinic polymorph of methyl 4-hydroxybenzoate. *Acta Crystallographica Section E: Structure Reports Online*, 2008. 64(7): p. o1255.
8. Nath N.K., Aggarwal H., and Nangia A., Crystal Structure of Methyl Paraben Polymorph II. *Crystal Growth and Design*, 2011. 11(4): p. 967–971.
9. Gelbrich T., et al., Four Polymorphs of Methyl Paraben: Structural Relationships and Relative Energy Differences. *Crystal Growth and Design*, 2013. 13(3): p. 1206–1217. <https://doi.org/10.1021/cg301639r> PMID: 23505337
10. HITCHINGS G.H. and ELION G.B., Chemical suppression of the immune response. *Pharmacological reviews*, 1963. 15(2): p. 365–405.
11. Sheldrick G., SHELXT—Integrated space-group and crystal-structure determination. *Acta Crystallographica Section A: Foundations of Crystallography*, 2015. 71(1): p. 3–8.
12. Sheldrick G., Crystal structure refinement with SHELXL. *Acta Crystallographica Section C*, 2015. 71(1): p. 3–8.
13. *Crystal Impact—Dr. H. Putz and D.K. Brandenburg, DIAMOND—Crystal and Molecular Structure Visualization, Kreuzherrenstr. 102, 53227 Bonn, Germany, 2018.*
14. Frisch, M., et al., *Gaussian ~ 09 Revision D. 01. 2014.*
15. Dennington, R., T. Keith, and J. Millam, *GaussView, Version 4.1. 2. Semichem Inc., Shawnee Mission, KS, 2007.*
16. Hohenberg P. and Kohn W., *Phys. Rev. B*, 1964. 136: p. 864–871.
17. Standards, N.I.o. and Technology, *Precomputed Vibrational Scaling Factors. 2018.*
18. Fleming I., *Frontier Orbitals and Organic Chemical Reactions 1976. Wiley and Sons, London, 1982.*
19. Chikate R.C. and Padhye S.B., Transition metal quinone–thiosemicarbazone complexes 2: Magnetism, ESR and redox behavior of iron (II), iron (III), cobalt (II) and copper (II) complexes of 2-thiosemicarbazido-1, 4-naphthoquinone. *Polyhedron*, 2005. 24(13): p. 1689–1700.
20. Al-Khodir F.A. and Refat M.S., Synthesis, spectroscopic, thermal and anticancer studies of metal-antibiotic chelations: Ca (II), Fe (III), Pd (II) and Au (III) chloramphenicol complexes. *Journal of Molecular Structure*, 2016. 1119: p. 157–166.

21. Wolff S., et al., Crystal explorer. 2012, University of Western Australia Crawley, Australia.
22. Eltayeb N.E., et al., Hirshfeld Surface analysis, spectroscopic, biological studies and molecular docking of (4E)-4-((naphthalen-2-yl) methyleneamino)-1, 2-dihydro-2, 3-dimethyl-1-phenylpyrazol-5-one. *Journal of Molecular Structure*, 2020. 1202: p. 127315.
23. Spackman M.A. and Jayatilaka D., Hirshfeld surface analysis. *CrystEngComm*, 2009. 11(1): p. 19–32.
24. Kumar S.S., Athimoolam S., and Sridhar B., XRD, vibrational spectra and quantum chemical studies of an anticancer drug: 6-Mercaptopurine. *Spectrochimica Acta Part A: Molecular and Biomolecular Spectroscopy*, 2015. 146: p. 204–213.
25. Devi P.K., Venkatachalam K., and Poonkothai M., Spectroscopic, optical, thermal, antimicrobial and density functional theory studies of 4-aminopyridinium 4-hydroxy benzoate hydrate crystal. *Journal of Molecular Structure*, 2016. 1119: p. 462–471.
26. Carugo O., How root-mean-square distance (rmsd) values depend on the resolution of protein structures that are compared. *Journal of applied crystallography*, 2003. 36(1): p. 125–128.
27. Sıdır İ., et al., Ab initio Hartree–Fock and density functional theory investigations on the conformational stability, molecular structure and vibrational spectra of 7-acetoxy-6-(2, 3-dibromopropyl)-4, 8-dimethyl-coumarin molecule. *Journal of Molecular Structure*, 2010. 964(1–3): p. 134–151.
28. Pearson R.G., Recent advances in the concept of hard and soft acids and bases. *Journal of Chemical Education*, 1987. 64(7): p. 561.
29. Sayin K. and Karakaş D., Quantum chemical studies on the some inorganic corrosion inhibitors. *Corrosion science*, 2013. 77: p. 37–45.
30. Rahmouni N.T., et al., New mixed amino acids complexes of iron (III) and zinc (II) with isonitrosoacetophenone: Synthesis, spectral characterization, DFT study and anticancer activity. *Spectrochimica Acta Part A: Molecular and Biomolecular Spectroscopy*, 2019. 213: p. 235–248.
31. Vijayan N., et al., Growth, optical, thermal and mechanical studies of methyl 4-hydroxybenzoate single crystals. *Journal of crystal growth*, 2003. 256(1–2): p. 174–182.
